# Supplementary material for: Field Suppression of Spotted Wing Drosophila (SWD) (Drosophila suzukii Matsumura) Using the Sterile Insect Technique (SIT)
Source: MDPI journal article supplement (doi:10.3390/insects13040328), 2022-03-26
Supplement: s1 [file s1]

## Supporting Information

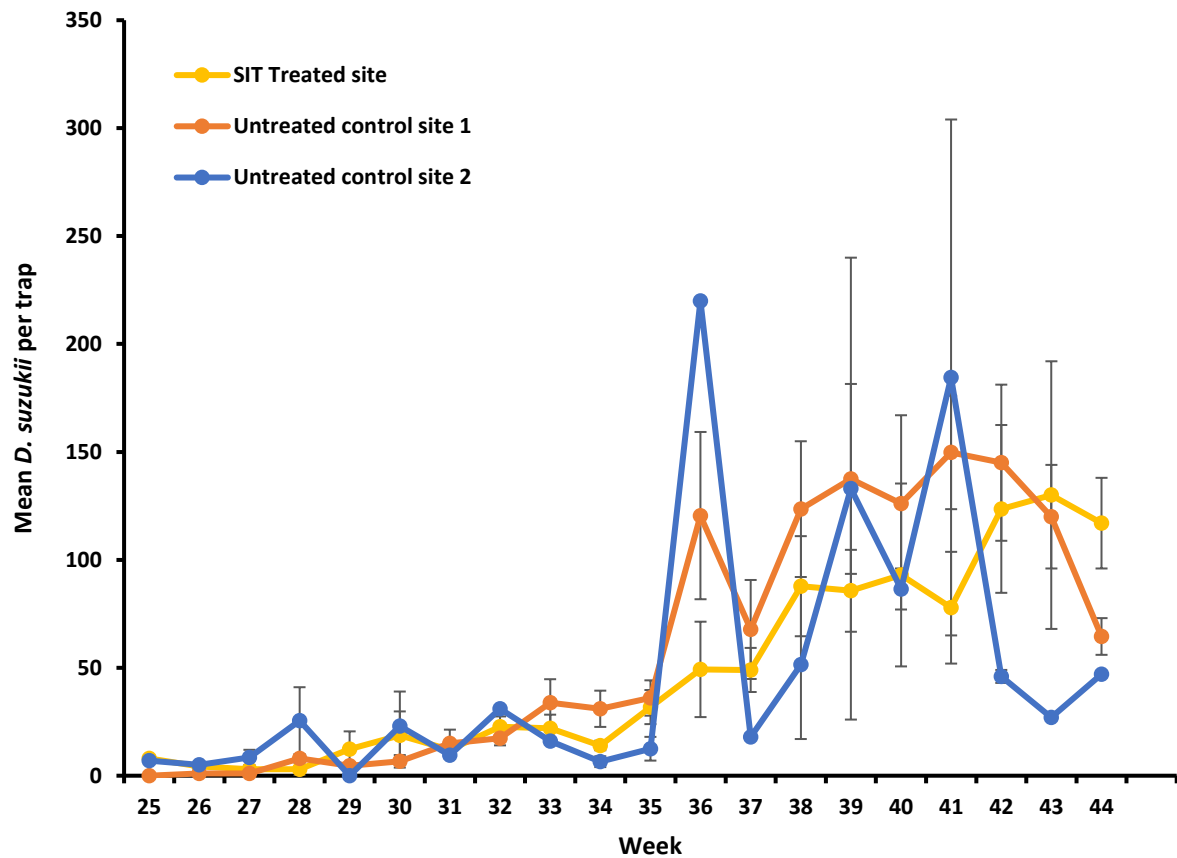

Figure S1. Mean number of *D. suzukii* captured per week in liquid baited traps in the three seasons before the study (2018-2020). Sites presented relatively similar levels of *D. suzukii* infestation in previous years. The type of liquid bait varied from season to season and the number of traps varied from site to site and season to season. For most of the data points presented, data were collected from at least two to three traps - one trap per site per year; a few data points had two. There were no data available for untreated site 1 in 2018. Error bars represent the standard error of the mean. Lack of error bars means data derived from a single trap.

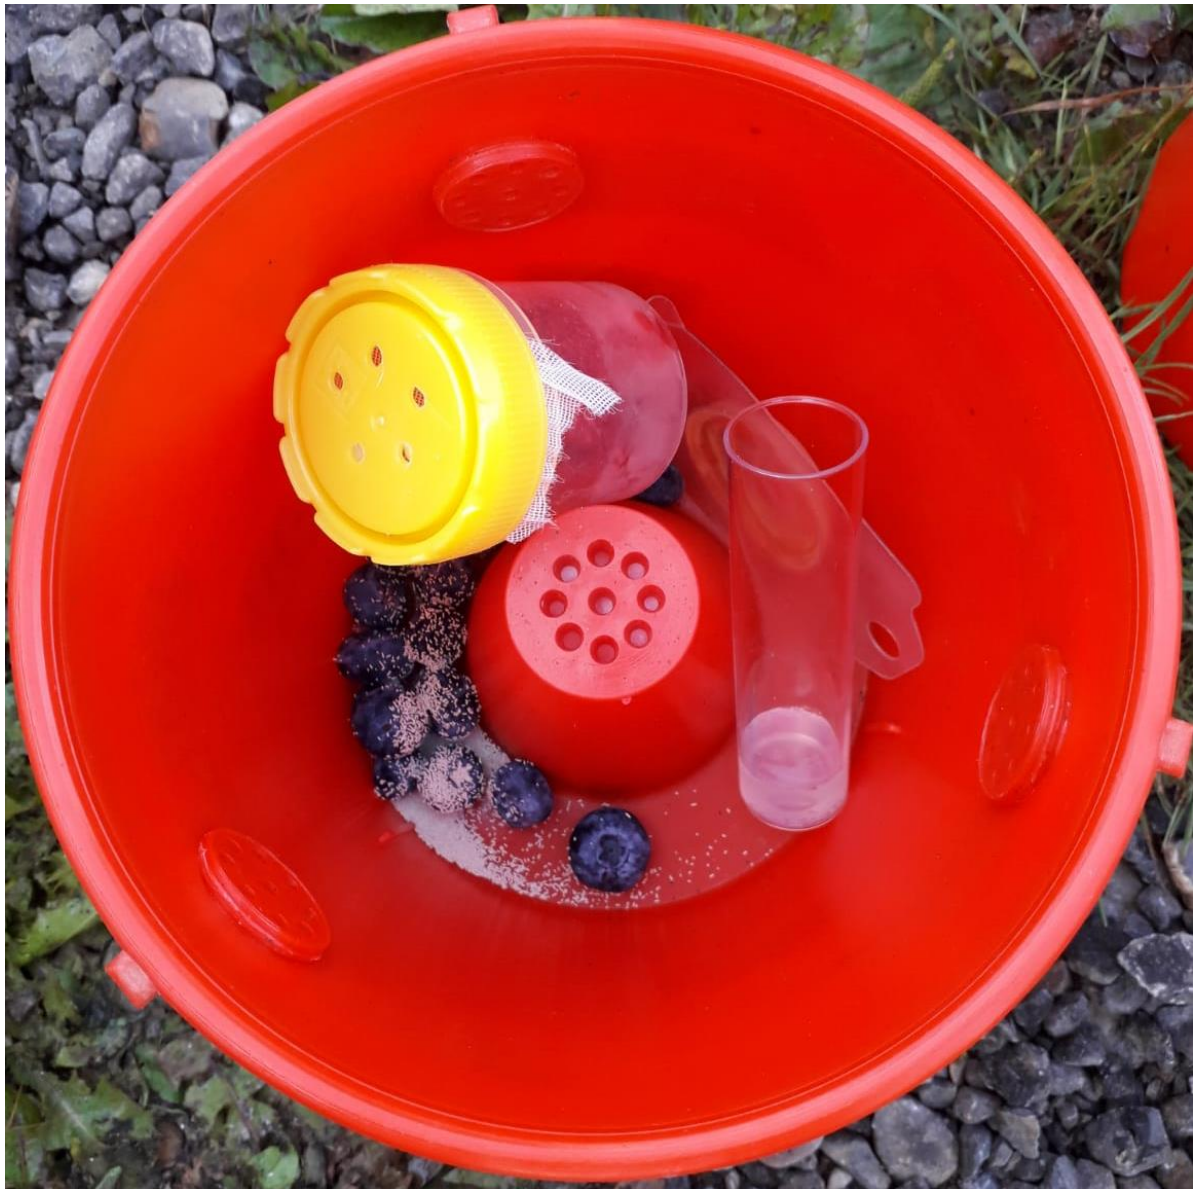

Figure S2. An example of a Suzuki Trap (Russell IPM Suzuki Trap; red base/transparent top) used to collect wild females in the field. Suzuki Traps up to week 36 included a dry lure (Russell IPM SWD dry lure), ~20 blueberries, ~20 g frozen raspberries (included in a flat-bottom polypropylene 70 ml yellow-lidded container), and ~2 g Bakers yeast (sprinkled on blueberries), to attract *D. suzukii*, and a vial with ~10 ml of sugar-agar media (2% w/v agar, 5% w/v sucrose, 0.3% v/v acetic acid) as a source of food. Holes were made on the yellow lids to maximize odour release of the raspberries but a mesh was placed under the lid to avoid *D. suzukii* from entering the container.

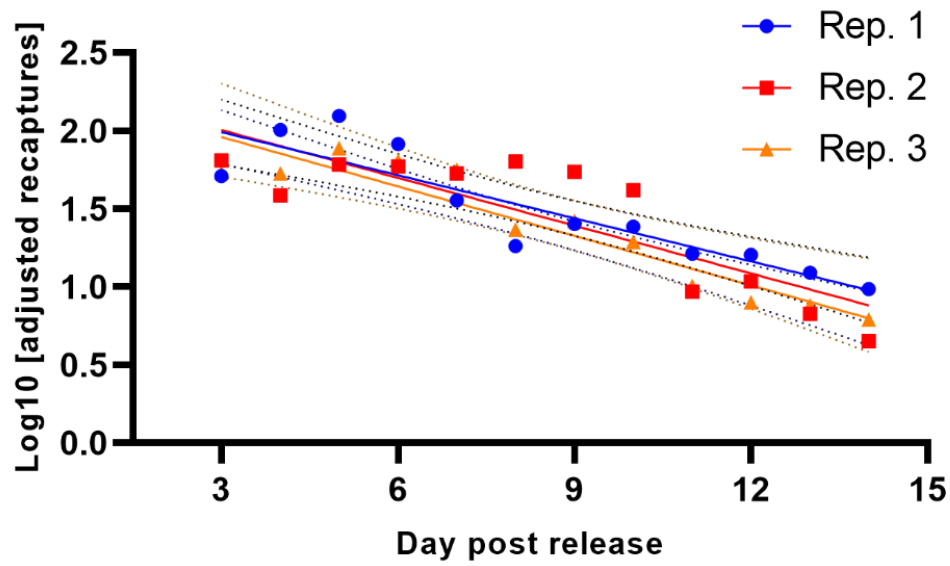

Figure S3. Regression lines of  $\log_{10}$  [adjusted recaptures] of released sterile male *D. sukuzii* conducted as part of the longevity experiment at the SIT treated site. Recaptures were adjusted to account for males removed from the trial (recaptured on previous days) and converted to three days moving averages. Doted lines represent the confidence bands of the regression lines. Rep. = replicate.

Table S1. Fertility of flies sampled from release vials. Table shows the number of irradiated males sampled from the vials each day, the number of virgin females used in the crosses, the number of eggs laid by the females in a 24 hours period and the number of pupae generated after 10-day incubation of the eggs. Fertility is expressed as percentage of eggs that produced pupae.

| <b>Irradiation date</b> | <b>No. Males sampled</b> | <b>No. Females</b> | <b>No. Eggs</b> | <b>No. Pupae</b> | <b>% Fertility</b> |
|-------------------------|--------------------------|--------------------|-----------------|------------------|--------------------|
| <b>16-Apr</b>           | 30                       | 30                 | 124             | 1                | 1.28               |
| <b>20-Apr</b>           | 30                       | 30                 | 212             | 2                | 0.94               |
| <b>23-Apr</b>           | 30                       | 30                 | 94              | 17               | 16.48              |
| <b>04-May</b>           | 30                       | 30                 | 314             | 19               | 6.23               |
| <b>07-May</b>           | 30                       | 30                 | 173             | 16               | 10.26              |
| <b>18-May</b>           | 30                       | 30                 | 236             | 5                | 2.64               |
| <b>25-May</b>           | 30                       | 30                 | 83              | 0                | 0.00               |
| <b>28-May</b>           | 40                       | 40                 | 312             | 0                | 0.00               |
| <b>01-Jun</b>           | 40                       | 40                 | 179             | 2                | 0.86               |
| <b>08-Jun</b>           | 60                       | 60                 | 341             | 5                | 1.48               |
| <b>22-Jun</b>           | 40                       | 40                 | 206             | 1                | 0.20               |
| <b>02-Jul</b>           | 40                       | 40                 | 99              | 0                | 0.00               |
| <b>13-Jul</b>           | 40                       | 40                 | 59              | 2                | 2.45               |
| <b>20-Jul</b>           | 40                       | 40                 | 192             | 0                | 0.00               |
| <b>23-Jul</b>           | 40                       | 40                 | 200             | 2                | 0.91               |
| <b>06-Aug</b>           | 50                       | 50                 | 257             | 9                | 2.95               |
| <b>10-Aug</b>           | 40                       | 40                 | 105             | 1                | 2.08               |
| <b>13-Aug</b>           | 40                       | 40                 | 91              | 5                | 7.78               |
| <b>17-Aug</b>           | 40                       | 40                 | 213             | 12               | 5.59               |
| <b>20-Aug</b>           | 40                       | 40                 | 193             | 5                | 2.62               |

Table S2. Insecticide application records in the SIT treated and control sites during the 2021 season.

| Site                            | Spray date | Week | Active ingredient                        | Application rate          |
|---------------------------------|------------|------|------------------------------------------|---------------------------|
| <b>SIT treated site</b>         | 05-May     | 19   | Spirotetramat (100g L <sup>-1</sup> )    | 1,000 mL ha <sup>-1</sup> |
|                                 | 19-Aug     | 34   | Cyantraniliprole (100g L <sup>-1</sup> ) | 750 mL ha <sup>-1</sup>   |
| <b>Untreated control site 1</b> | 30-Apr     | 18   | Spirotetramat (100g L <sup>-1</sup> )    | 1,000 mL ha <sup>-1</sup> |
|                                 | 20-Sep     | 38   | Cyantraniliprole (100g L <sup>-1</sup> ) | 750 mL ha <sup>-1</sup>   |
| <b>Untreated control site 2</b> | 06-May     | 19   | Spirotetramat (100g L <sup>-1</sup> )    | 1,000 mL ha <sup>-1</sup> |
|                                 | 20-Sep     | 38   | Cyantraniliprole (100g L <sup>-1</sup> ) | 750 mL ha <sup>-1</sup>   |

Table S3: Number and percentage of sterile males released under polytunnels and at the perimeter.

|               |     |      | Number released |           |       | % of the total released |           |
|---------------|-----|------|-----------------|-----------|-------|-------------------------|-----------|
| Date released |     | Week | Tunnels         | Perimeter | Total | Tunnels                 | Perimeter |
| 12/04/21      | Mon | 15   | 3836            | 1020      | 4856  | 79.0                    | 21.0      |
| 16/04/21*     | Fri | 16   | 3704            | 800       | 4504  | 82.2                    | 17.8      |
| 20/04/21*     | Tue | 16   | 3777            | 1156      | 4933  | 76.6                    | 23.4      |
| 23/04/21*     | Fri | 17   | 4446            | 960       | 5406  | 82.2                    | 17.8      |
| 27/04/21*     | Tue | 17   | 4287            | 1105      | 5392  | 79.5                    | 20.5      |
| 30/04/21*     | Fri | 18   | 2334            | 3200      | 5534  | 42.2                    | 57.8      |
| 04/05/21      | Tue | 18   | 2932            | 1904      | 4836  | 60.6                    | 39.4      |
| 07/05/21      | Fri | 19   | 2572            | 2464      | 5036  | 51.1                    | 48.9      |
| 11/05/21      | Tue | 19   | 3193            | 2160      | 5353  | 59.6                    | 40.4      |
| 14/05/21      | Fri | 20   | 4814            | 1040      | 5854  | 82.2                    | 17.8      |
| 18/05/21      | Tue | 20   | 8336            | 1870      | 10206 | 81.7                    | 18.3      |
| 21/05/21      | Fri | 21   | 5635            | 3040      | 8675  | 65.0                    | 35.0      |
| 25/05/21      | Tue | 21   | 5673            | 5250      | 10923 | 51.9                    | 48.1      |
| 28/05/21      | Fri | 22   | 6900            | 5766      | 12666 | 54.5                    | 45.5      |
| 01/06/21      | Tue | 22   | 9220            | 5600      | 14820 | 62.2                    | 37.8      |
| 04/06/21      | Fri | 23   | 8586            | 5200      | 13786 | 62.3                    | 37.7      |
| 08/06/21      | Tue | 23   | 7563            | 5600      | 13163 | 57.5                    | 42.5      |
| 11/06/21      | Fri | 24   | 8303            | 8600      | 16903 | 49.1                    | 50.9      |
| 15/06/21      | Tue | 24   | 7489            | 10200     | 17689 | 42.3                    | 57.7      |
| 18/06/21      | Fri | 25   | 9312            | 8600      | 17912 | 52.0                    | 48.0      |
| 22/06/21      | Tue | 25   | 9555            | 7300      | 16855 | 56.7                    | 43.3      |
| 25/06/21      | Fri | 26   | 9345            | 7400      | 16745 | 55.8                    | 44.2      |
| 29/06/21      | Tue | 26   | 9308            | 7400      | 16708 | 55.7                    | 44.3      |
| 02/07/21      | Fri | 27   | 9387            | 7800      | 17187 | 54.6                    | 45.4      |

|                 |     |    |       |       |       |      |      |
|-----------------|-----|----|-------|-------|-------|------|------|
| <b>06/07/21</b> | Tue | 27 | 9746  | 7200  | 16946 | 57.5 | 42.5 |
| <b>09/07/21</b> | Fri | 28 | 9600  | 7700  | 17300 | 55.5 | 44.5 |
| <b>13/07/21</b> | Tue | 28 | 9384  | 7200  | 16584 | 56.6 | 43.4 |
| <b>16/07/21</b> | Fri | 29 | 9911  | 7400  | 17311 | 57.3 | 42.7 |
| <b>20/07/21</b> | Tue | 29 | 10184 | 7200  | 17384 | 58.6 | 41.4 |
| <b>23/07/21</b> | Fri | 30 | 8938  | 8500  | 17438 | 51.3 | 48.7 |
| <b>27/07/21</b> | Tue | 30 | 11332 | 5200  | 16532 | 68.5 | 31.5 |
| <b>30/07/21</b> | Fri | 31 | 16202 | 5200  | 21402 | 75.7 | 24.3 |
| <b>03/08/21</b> | Tue | 31 | 11535 | 5200  | 16735 | 68.9 | 31.1 |
| <b>06/08/21</b> | Fri | 32 | 16589 | 5400  | 21989 | 75.4 | 24.6 |
| <b>10/08/21</b> | Tue | 32 | 15055 | 6500  | 21555 | 69.8 | 30.2 |
| <b>13/08/21</b> | Fri | 33 | 15232 | 6500  | 21732 | 70.1 | 29.9 |
| <b>17/08/21</b> | Tue | 33 | 15000 | 6500  | 21500 | 69.8 | 30.2 |
| <b>20/08/21</b> | Fri | 34 | 14107 | 7100  | 21207 | 66.5 | 33.5 |
| <b>24/08/21</b> | Tue | 34 | 15011 | 6500  | 21511 | 69.8 | 30.2 |
| <b>27/08/21</b> | Fri | 35 | 17159 | 7600  | 24759 | 69.3 | 30.7 |
| <b>31/08/21</b> | Tue | 35 | 14693 | 6400  | 21093 | 69.7 | 30.3 |
| <b>03/09/21</b> | Fri | 36 | 16805 | 7600  | 24405 | 68.9 | 31.1 |
| <b>07/09/21</b> | Tue | 36 | 17915 | 7500  | 25415 | 70.5 | 29.5 |
| <b>10/09/21</b> | Fri | 37 | 16136 | 7600  | 23736 | 68.0 | 32.0 |
| <b>14/09/21</b> | Tue | 37 | 19782 | 7600  | 27382 | 72.2 | 27.8 |
| <b>17/09/21</b> | Fri | 38 | 17969 | 8300  | 26269 | 68.4 | 31.6 |
| <b>21/09/21</b> | Tue | 38 | 21134 | 8300  | 29434 | 71.8 | 28.2 |
| <b>24/09/21</b> | Fri | 39 | 19652 | 9400  | 29052 | 67.6 | 32.4 |
| <b>28/09/21</b> | Tue | 39 | 20715 | 8200  | 28915 | 71.6 | 28.4 |
| <b>01/10/21</b> | Fri | 40 | 19071 | 9500  | 28571 | 66.7 | 33.3 |
| <b>05/10/21</b> | Tue | 40 | 29196 | 14400 | 43596 | 67.0 | 33.0 |

|                 |     |    |       |      |       |      |      |
|-----------------|-----|----|-------|------|-------|------|------|
| <b>08/10/21</b> | Fri | 41 | 19649 | 9800 | 29449 | 66.7 | 33.3 |
| <b>12/10/21</b> | Tue | 41 | 12898 | 7000 | 19898 | 64.8 | 35.2 |

**\* Flies released on these dates were marked with alternated colours and used to calculate Probability of Daily Survival (PDS), Average Life Expectancy (ALE), and Half-Life (HL).**



Table S4. Summary statistics, best fit values, 95% confidence intervals, goodness of fit and normality tests of the three releases of sterile male *D. suzukii* conducted as part of the longevity experiment at the SIT treated site.

|                                                              | <b>Replicate / Colour</b> |                        |                           |
|--------------------------------------------------------------|---------------------------|------------------------|---------------------------|
|                                                              | <b>Replica 1 / Blue</b>   | <b>Replica 2 / Red</b> | <b>Replica 3 / Orange</b> |
| <b>Best-fit values</b>                                       |                           |                        |                           |
| <b>Y-Intercept (<math>\pm 95\%</math> CI)</b>                | 2.26 (1.97 to 2.55)       | 2.28 (1.88 to 2.68)    | 2.25 (2.02 to 2.48)       |
| <b>Slope (<math>\pm 95\%</math> CI)</b>                      | -0.09 (-0.12 to -0.06)    | -0.10 (-0.14 to -0.05) | -0.10 (-0.12 to -0.07)    |
| <b>Goodness of Fit</b>                                       |                           |                        |                           |
| <b>Degrees of Freedom</b>                                    | 10                        | 10                     | 10                        |
| <b>R squared</b>                                             | 0.80                      | 0.71                   | 0.89                      |
| <b>Adjusted R squared</b>                                    | 0.78                      | 0.68                   | 0.87                      |
| <b>Sum of Squares</b>                                        | 0.28                      | 0.54                   | 0.18                      |
| <b>Sy.x</b>                                                  | 0.17                      | 0.23                   | 0.14                      |
| <b>RMSE</b>                                                  | 0.16                      | 0.22                   | 0.13                      |
| <b>Normality of Residuals</b>                                |                           |                        |                           |
| <b>Shapiro-Wilk (W)</b>                                      | 0.95                      | 0.91                   | 0.97                      |
| <b>P value</b>                                               | 0.57                      | 0.24                   | 0.86                      |
| <b>Passed normality test<br/>(<math>\alpha=0.05</math>)?</b> | Yes                       | Yes                    | Yes                       |
| <b>P value summary</b>                                       | ns                        | ns                     | ns                        |

Table S5. Fertility of wild female *D. sukukii* collected from the control and SIT treated sites from week 30 to 41. Table shows the number of females collected (control sites combined), number of eggs laid, number of pupae generated from those eggs and the estimated fecundity (number of eggs per female per 24 hour laying period) and fertility (percentage of eggs that produce pupae). Colour-coded cells highlight changes in fecundity and fertility over time, with darker colours for value increases.

| <u>Control sites</u> |                  |          |           |           |               | <u>SIT treated site</u> |          |           |           |               |
|----------------------|------------------|----------|-----------|-----------|---------------|-------------------------|----------|-----------|-----------|---------------|
| Week                 | No. wild females | No. eggs | No. pupae | Fecundity | Fertility (%) | No. wild females        | No. eggs | No. pupae | Fecundity | Fertility (%) |
| 30                   | 2                | 22       | 20        | 11.00     | 90.91         | 11                      | 214      | 136       | 19.45     | 36.71         |
| 31                   | 8                | 52       | 42        | 6.50      | 75.40         | 29                      | 193      | 58        | 6.66      | 42.23         |
| 32                   | 18               | 151      | 43        | 8.39      | 32.76         | 25                      | 206      | 88        | 8.24      | 56.44         |
| 33                   | 12               | 224      | 193       | 18.67     | 68.88         | 23                      | 193      | 75        | 8.39      | 43.75         |
| 34                   | 8                | 0        | 0         | 0.00      | –             | 25                      | 246      | 210       | 9.84      | 83.09         |
| 35                   | 13               | 237      | 177       | 18.23     | 72.58         | 38                      | 706      | 410       | 18.58     | 60.56         |
| 36                   | 22               | 155      | 142       | 7.05      | 92.48         | 90                      | 1098     | 719       | 12.20     | 65.94         |
| 37                   | 39               | 760      | 511       | 19.49     | 74.58         | 31                      | 582      | 393       | 18.77     | 62.04         |
| 38                   | 90               | 359      | 304       | 3.99      | 79.98         | 220                     | 753      | 525       | 3.42      | 69.31         |
| 39                   | 66               | 115      | 55        | 1.74      | 59.28         | 244                     | 826      | 504       | 3.39      | 57.68         |

|           |    |   |   |      |        |     |    |    |      |       |
|-----------|----|---|---|------|--------|-----|----|----|------|-------|
| <b>40</b> | 71 | 0 | 0 | 0.00 | –      | 383 | 39 | 21 | 0.10 | 48.99 |
| <b>41</b> | 71 | 1 | 1 | 0.01 | 100.00 | 265 | 21 | 6  | 0.08 | 57.41 |
